# Supplementary material for: Prognostic value of serum Mrp 8/14 in sepsis-induced acute respiratory distress syndrome patients: a retrospective cohort study
Source: PeerJ. 2024 Dec 13;12:e18718. doi: 10.7717/peerj.18718 (PMC11648679; doi:10.7717/peerj.18718)
Supplement: Supplemental Information 1 [file peerj-12-18718-s001.xlsx]

## Sheet: Survivors 
Number	Sex	Age	APACHE II	SOFA	shock or not	CRRT or not	Duration of Mechanical ventilation(d)	Length of ICU stay(d)	ICU expense	WBC	Neutrophil	CRP	PLT	IL-6	PCT	Scr	Bun	Sodium	Hypernatremia or not	Calcium	Albumin	ALT	AST	P/F	LUS	Mrp 8/14
1	male	82	25	11	Yes	No	8	16	125920	20	16.87	330.19	140	7869.1	41.49	131.8	8.17	137.5	No	1.17	24.8	14	27	193.2	14	5.5207
2	male	64	28	8	No	No	3	14	81100.7	9.22	5.95	62.16	92	2516.96	3.83	87	4.9	132.9	No	1.12	32.8	33	146	125.5	18	3.236
3	male	76	16	9	No	No	5	14	31579.6	11.87	9.42	17.7	154	806	2.2	95.8	6.49	135.4	No	1.12	39.5	9	18	175.6	11	7.4342
4	female	54	19	17	Yes	Yes	14	26	222286	17.84	14.55	192.08	84	15105.6	14.58	394	14.38	137.4	No	1.18	31.1	37	96	147.5	21	11.827
5	male	81	19	7	Yes	No	2	5	32193	21.66	15.35	11.6	110	6612.78	11.55	181	7.1	143	No	1.28	38.6	11	19	183.4	12	5.8757
6	female	76	17	13	No	No	3	5	40241.3	18.43	12.24	95.36	199	4494.68	12.43	54.5	4.66	138.3	No	1.17	30	10	18	171.4	16	6.0739
7	female	78	27	6	Yes	No	6	7	69313.6	10.57	9.24	16.2	237	72.86	15.04	41	4.2	135.1	No	1.35	30.7	7	9	96.8	22	10.8631
8	male	53	26	6	Yes	No	9	12	63475.9	21.03	13.69	46.62	245	1248.12	13.63	215.7	19.38	130.5	No	1.14	28.2	753	135	70.5	28	15.1081
9	male	85	29	10	No	No	8	10	81449.7	30.27	15.6	58.2	103	9821.97	11.77	97	10.75	139.2	No	1.13	22.5	23	33	225.9	12	5.3856
10	female	76	26	9	No	No	9	10	125434	19.34	15.51	44.6	118	964	2.12	42.8	3.82	142.8	No	1.87	26.3	58	104	191.8	15	9.4847
11	male	75	25	10	Yes	No	4	13	64481.8	10.15	6.87	76.58	125	690.45	7.44	75	10.22	146.1	Yes	1.79	26.6	9	14	196.3	15	4.1117
12	female	79	27	16	Yes	No	8	12	90574	19.58	14.38	115.98	357	1631.69	43.47	154.7	22.74	143.1	No	1.34	27.8	6	12	238.7	9	6.3063
13	male	71	24	10	No	No	6	24	289768	7.33	5.89	331.87	160	1774.31	3.9	68.76	7.09	139.2	No	1.87	28.53	13	38	185.8	19	9.9387
14	male	56	21	16	Yes	No	3	8	83549.7	14.06	11.75	239.96	385	1092.65	24.3	66.2	3.07	133.9	No	1.09	30	52	27	182.3	21	11.1369
15	male	50	16	11	Yes	Yes	4	5	65225.8	11.57	8.9	159.69	280	185.76	5.68	390.3	22.75	147.9	Yes	1.29	25.7	5	11	140.3	19	14.3351
16	female	75	16	8	Yes	Yes	0	7	62105.6	30.27	25.06	113.38	67	36724.2	38.93	226.5	14.05	135.1	No	1.14	27.5	31	52	183.9	16	7.6422
17	female	70	23	17	Yes	No	0	5	150419	7.88	6.18	158.83	155	2220	46	109.4	9.44	128.4	No	1.13	28.8	150	215	213.3	11	11.6977
18	female	73	17	9	Yes	No	0	5	33536.2	19.34	12.29	40.46	82	9276.56	4.87	71.1	6.69	141.5	No	1.22	26.7	10	11	252.8	7	14.7979
19	female	67	32	8	Yes	No	0	7	59303.1	5.15	7.75	163	106	23943.1	68.95	83.3	5.99	135.26	No	1.04	31.9	60	82	189.5	20	17.4651
20	female	82	16	10	Yes	Yes	6	25	253423	13.58	18.27	113.24	52	7600.02	24.4	122.9	7.78	141.3	No	1.19	17.7	597	1126	190.33	18	10.4258
21	male	69	21	7	Yes	Yes	7	9	97351.2	15.57	11.38	11.44	61	2229.09	69.87	185.3	14.2	137.9	No	1.24	24.8	40	28	242.6	12	3.1109
22	male	73	19	6	Yes	Yes	6	9	83967.4	7.4	6.22	24.07	211	31834.8	42.45	170	9.81	142.4	No	1.27	37.1	13	18	176.2	19	11.7335
23	male	85	31	17	Yes	No	5	8	83523	12.01	10.7	49.91	146	33976.1	54.55	145	13.45	143.9	No	1.18	33.9	12	16	204.3	12	15.5349
24	male	70	20	6	Yes	No	3	23	67624.4	12.68	10.85	93.15	248	182.5	0.45	109.6	35.37	137.7	No	1.17	35.4	20	35	199.3	18	2.6297
25	male	70	17	4	Yes	No	3	11	37456.8	16.79	13.56	14.26	142	85.66	1.81	75.8	6.7	136	No	1.09	34.2	702	768	277.4	13	0.7388
26	male	46	27	7	Yes	No	3	7	50323	14.6	12.31	81.25	170	28.88	2.2	154.5	25.33	137.7	No	1.23	29.1	142	154	187	20	7.3864
27	male	80	24	6	Yes	Yes	8	8	106558	9.41	5.12	224.47	161	2611.64	8.56	102.2	11.51	138.7	No	1.2	24.4	38	25	169.7	19	11.8247
28	male	73	26	9	Yes	Yes	11	12	180912	12.67	10.98	180.16	135	10925.2	64.07	101.8	7.88	140.9	No	1.3	26.9	17	40	54.6	27	24.1753
29	female	70	25	6	Yes	No	5	10	63077.1	5.56	4.97	122.49	87	29940.8	43.58	147.5	13.33	129.1	No	1.06	27.7	76	110	229.7	18	3.9159
30	female	84	28	8	Yes	No	2	8	68714	17.08	15.98	116.35	15	107.99	1.36	316.8	27.52	133.2	No	1.16	22.5	22	33	259.4	21	4.8909
31	male	72	18	13	Yes	No	4	20	232650	4.45	3.75	224.42	215	237.24	25.58	46.2	9.38	141	No	1.19	33	20	14	193.1	15	9.0483
32	male	65	33	12	Yes	No	7	11	50419.2	9.98	7.23	178.32	123	925.19	17.54	123	32	149.4	Yes	1.56	27	87	105	197.4	14	15.3116
33	female	57	31	7	Yes	No	4	9	66637.7	12.49	11.23	98.43	110	9525.19	31.23	321	24	151	Yes	1.54	37	136	219	212	12	19.5229
34	female	59	14	5	Yes	Yes	0	12	95284.2	22.34	18.26	158.73	182	1043.61	8.49	66.5	5.58	143.25	No	1.12	32.7	17	27	260.4	9	2.169
35	female	63	19	19	Yes	Yes	3	7	59303.1	12.88	8.34	35	104	5319.43	7.54	234	23	129	No	1.23	29	34	54	167	22	12.8644
36	male	78	19	13	No	No	5	11	80529.5	10.11	8.34	87.32	115	98.56	3.22	132	23	146	Yes	1.23	29	109	193	178	20	12.0194
37	male	82	22	16	No	No	0	5	38059.3	17.29	15.67	185.89	191	249.76	38.98	124.9	17.66	133.71	No	1	27.1	25	36	296	13	2.9049
38	male	69	43	13	Yes	Yes	12	15	98269.1	21.03	19.98	110.25	291	19323.3	60.3	231.4	24.7	132.8	No	0.89	35.4	51	34	99.1	29	42.4507
39	male	77	24	11	Yes	No	1	13	137770	30.27	28.45	16.97	105	4.15	0.5	156.4	19.08	154.17	Yes	1.04	32.7	51	31	292	9	9.463
40	female	72	19	18	Yes	No	0	9	78389.8	19.34	12.67	98.88	177	9815.82	6.64	138.1	15.87	130.41	No	0.9	30.4	33	100	155	23	23.1761
41	male	60	15	14	Yes	No	0	6	55272.7	18.59	16.69	16.14	241	6.37	13.48	69.3	5.34	132.8	No	1.14	35.4	13	16	227.8	11	9.9085
42	female	65	18	14	Yes	Yes	4	11	73009	19.58	17.01	169.24	394	15.82	13.45	86.4	13.32	129.73	No	1.14	31.7	6	19	194	18	20.8996
43	male	64	22	8	No	No	0	6	76690.7	14.06	12.09	253.89	96	1043.72	45.32	774.7	29	131.41	No	1.03	28.32	19	11	217.1	15	8.1532
44	female	84	10	5	No	No	6	13	88197.9	14.84	12.05	171.89	214	2.85	0.12	63.2	12.04	137.65	No	1.06	35.27	25	15	195.6	18	15.5229
45	female	73	17	5	No	No	2	5	35744	5.4	4.2	44.66	194	1.97	0.02	48.6	3.88	134.18	No	1.05	32.23	59	25	294.9	9	0.838
46	male	58	22	6	No	No	0	5	38059.3	11.57	9.67	185.89	191	249.76	48.98	124.9	17.66	133.71	No	1	25.1	25	36	236	17	15.9049
47	male	64	51	13	Yes	Yes	12	15	148269	21.03	19.98	110.25	291	20123.3	54.3	231.4	24.7	132.8	No	0.89	36.4	51	34	89.1	27	42.4507
48	male	74	18	8	Yes	No	7	13	137770	14.27	12.45	116.97	105	4.15	0.5	156.4	19.08	154.17	Yes	1.04	32.7	51	31	282	10	9.463
49	female	74	31	10	Yes	No	0	9	78389.8	19.34	12.67	98.88	177	10235.8	56.64	138.1	15.87	150.41	Yes	0.9	30.4	33	100	155	21	21.1761
50	male	68	15	9	Yes	No	4	7	35272.7	18.59	14.69	106.14	241	6.37	8.48	69.3	5.34	132.8	No	1.14	35.4	13	16	227.8	13	4.9085
51	female	67	18	7	Yes	No	7	17	73009	13.58	8.01	169.24	394	53.54	27.85	86.4	13.32	129.73	No	1.14	35.7	6	19	214	11	20.8996
52	male	52	32	8	No	Yes	0	6	56690.7	12.06	8.09	233.89	96	43.72	23.32	774.7	29	131.41	No	1.03	28.43	19	11	297.1	9	2.1532
53	female	64	31	6	No	No	4	13	88197.9	13.84	11.05	271.89	214	2.85	0.12	63.2	12.04	137.65	No	1.06	33.72	25	15	145.4	18	12.5229
54	female	59	16	8	No	No	4	6	75744	7.4	4.2	144.66	194	1231.97	0.02	48.6	3.88	134.18	No	1.05	25.54	59	25	144.9	24	13.838
55	male	73	28	8	Yes	No	9	11	95919.7	2.68	1.87	130.19	140	7869.1	41.49	131.8	8.17	152.5	Yes	1.17	25.8	14	27	213.2	12	25.5207
56	male	58	19	8	No	No	6	10	121101	6.79	5.95	112.16	92	216.96	3.83	87	4.9	151.9	Yes	1.12	33.8	33	146	175.5	22	11.4342
57	male	76	13	14	No	No	5	10	121580	8.56	6.42	17.7	154	806	12.2	95.8	6.49	135.4	No	1.12	37.5	9	18	175.6	20	8.6414
58	female	74	29	16	Yes	Yes	12	20	182286	17.41	14.55	92.08	84	15105.6	60.18	394	14.38	137.4	No	1.18	32.1	37	96	187.5	19	17.827
59	male	71	19	6	Yes	No	2	5	32193	5.56	4.35	11.6	110	6612.78	11.55	181	7.1	143	No	1.28	37.6	11	19	193.4	22	11.2631
60	female	76	17	9	No	No	3	5	50241.3	9.98	7.24	95.36	199	344.68	16.43	54.5	4.66	138.3	No	1.17	30.32	10	18	161.4	12	6.6685
61	male	56	18	6	Yes	Yes	3	19	224620	12.88	11.63	84.12	197	927.68	16.43	133.4	10.2	139	No	1.27	33.7	9	10	196.3	16	5.7676
62	female	70	16	6	Yes	No	12	17	59313.6	18.11	12.24	96.2	237	72.86	100	41	4.2	135.1	No	1.35	31.7	7	9	76.8	21	1.98631
63	male	73	29	6	Yes	No	7	11	83475.9	14.61	11.69	106.62	245	9248.12	3.63	215.7	19.38	140.5	No	1.14	29.2	753	135	75.5	19	21.1081
64	male	75	24	19	No	No	8	10	85449.7	17.29	15.6	58.2	103	9821.97	17.77	97	10.75	139.2	No	1.13	23.5	23	33	215.9	10	7.5928

## Sheet: Non-survivors 
Number	Sex	Age	APACHE II	SOFA	shock or not	CRRT or not	Duration of Mechanical ventilation(d)	Length of ICU stay(d)	ICU expense	WBC	Neutrophil	CRP	PLT	IL-6	PCT	Scr	Bun	Sodium	Hypernatremia or not	Calcium	Albumin	ALT	AST	P/F	LUS	Mrp 8/14
1	male	76	30	12	YES	YES	6	10	156690	18.96	12.17	45.53	147	10103.2	16.81	393.9	28.33	159.6	Yes	1.13	28.5	49	80	112.4	21	31.7946
2	male	82	25	8	No	No	3	5	72981.4	7.36	3.61	26.88	118	26.64	34.16	106.3	9.2	137.2	No	1.12	36.6	10	19	163.7	23	9.3532
3	male	66	26	11	No	No	7	25	179898	17.92	7.89	203.26	182	9174.63	22.71	145.4	14.94	129	No	1.15	26.2	7	11	91.8	27	25.6865
4	male	80	33	9	YES	No	12	15	129725	15.51	12.21	110	178	12837.9	60.18	231.5	42.72	136.8	No	1	29.9	290	756	201.5	16	26.3892
5	male	68	28	16	YES	No	11	15	164005	14.43	12.98	109.38	95	49.15	23.41	113.83	13.89	149.5	No	1.21	22.09	33	32	213.2	19	27.5712
6	female	69	27	11	YES	No	8	25	200293	6.58	3.42	149.04	301	12808.2	46.87	53.8	6	127.8	No	1.27	23.79	9	53	159.6	25	20.5441
7	female	60	33	7	YES	YES	6	6	63309.1	24.28	13.08	222.8	90	1880.26	11.85	192.4	20.27	135.6	No	1.79	19.4	19	26	190.24	13	4.555
8	male	78	24	15	No	No	10	10	157598	9.23	7.69	103	174	12212.9	68.18	80.4	17.02	157.8	Yes	1.18	27.2	9	26	106.8	27	36.7856
9	female	73	23	7	YES	No	5	5	86253.8	7.15	5.84	98.53	45	673.67	13.45	80.2	7.49	119	No	1.18	29.6	10	16	133.6	24	23.6577
10	male	60	24	19	YES	YES	12	19	244620	18.54	11.63	127.12	197	9827.68	65.21	133.4	10.2	139	No	1.27	34.7	9	10	126.3	26	31.7946
11	female	78	29	6	No	No	0	5	143407	12.54	10.97	44.4	37	8957.72	67.97	102.9	7.86	135.2	No	1.16	32.9	35	63	219.6	13	37.2
12	male	73	26	11	YES	No	8	11	156134	7.88	5.94	115	269	21832.8	27.74	160.2	15.62	159.2	Yes	1.3	30.6	25	54	191.5	22	24.2613
13	male	60	31	14	YES	No	8	8	126255	18.59	15.46	64.64	240	12138.1	57.28	204.5	6.19	162.3	Yes	1.11	39.7	261	1138	219.1	24	23.4811
14	male	82	27	9	YES	No	12	15	156536	15.57	10.59	184.73	95	11187.6	87.87	63.6	6.93	130.5	No	1.22	27.7	12	19	83.6	33	42.2649
15	male	82	23	10	No	No	4	4	28493.1	14.84	12.95	290.98	177	7439.62	3.75	196.6	16.47	158.3	Yes	1.08	26	20	91	191.8	20	6.236
16	female	73	27	11	YES	No	25	25	336303	15.4	11.95	187.8	142	9220	86.41	45.1	8.85	129.6	No	1.25	26.3	22	20	81.6	33	38.9207
17	male	75	31	15	YES	No	2	4	92053.2	14.01	11.92	55.52	161	349.15	24.55	78.9	13.97	163.4	Yes	1.08	23.9	41	39	120.9	24	16.1297
18	male	89	29	12	YES	No	14	14	165462	16.16	12.51	313	73	257.58	11.91	69.8	7.38	133.08	No	1.06	17.3	22	29	260.1	18	18.9081
19	male	70	25	11	YES	YES	24	27	314025	13.54	11.24	29.47	120	10126.3	39.22	555.1	59.01	157.01	Yes	0.88	25.6	9	117	169.3	21	28.8819
20	male	72	41	13	YES	No	15	15	210173	21.03	18.05	98.96	675	1600.82	1.02	58.8	8.93	162.8	Yes	1.17	27.2	37	47	194.1	15	2.5081
21	male	73	42	12	YES	YES	11	19	237160	18.59	8.01	70.94	142	1276.72	29.11	734.9	48.63	141.9	No	1.27	32.1	11	17	184.5	19	18.4526
22	male	66	27	12	YES	No	14	21	252390	3.33	2.58	95.39	239	21202.9	32.05	158.1	13.51	154.41	Yes	1.06	23.5	17	13	108.9	27	49.7317
23	male	89	28	11	No	No	11	13	71158.8	12.06	8.27	43	57	10126.6	7.91	76.4	19.54	131.3	No	1.23	20.5	13	26	92.6	33	33.6315
24	female	67	24	10	YES	YES	3	7	85701.5	13.84	11.65	195.4	35	644.12	37.5	408.2	29.68	138.97	No	1.04	26.5	24	21	190	25	11.5993
25	male	70	22	19	YES	YES	5	27	230681	14.16	12.3	123.43	36	21042.4	39.47	409.7	29.27	171.2	Yes	1.07	22.2	126	221	203	15	10.3166
26	female	84	29	11	YES	No	4	6	124837	6.63	3.39	146.48	241	76.77	3.43	107.3	18.41	148	Yes	1.27	29.4	53	65	192.4	20	12.1574
27	male	73	26	11	YES	YES	5	25	89170.6	8.56	4.87	232.25	94	307.8	20.17	329.9	45.63	158	Yes	1.35	28.4	20	30	194.4	17	5.8712
28	female	67	19	18	YES	No	13	18	265589	17.41	10.23	32.22	120	9299.65	34.23	103.4	24.32	132.7	No	1.24	23.4	9	47	254.9	16	21.6887
29	male	57	23	11	YES	YES	3	11	185825	9.56	5.75	20.78	130	36.8	11.99	507.9	33.44	154.48	Yes	1.14	24.5	354	904	147.9	20	6.3151
30	male	86	24	18	YES	YES	1	4	47554.3	17.17	14.54	101	152	10186.1	54.41	364.6	40.82	131.9	No	0.82	31	284	382	259.5	12	31.6796
31	male	83	29	15	YES	YES	4	4	61673.8	14.61	11.95	176.43	120	210.7	29.94	660.4	33.07	159.55	Yes	1.08	29.5	20	34	186.9	21	12.6849
32	male	79	27	12	YES	No	9	12	89439.1	21.88	17.31	146.43	150	10238.4	67.46	497.7	48.45	132.34	No	1.48	25.6	10	54	197.4	21	29.0669
33	male	75	25	13	YES	YES	6	8	91729.6	17.15	14.01	203.05	60	13970.9	25.64	628.4	37.61	139.8	No	0.87	27.4	13	22	244	15	21.3521
34	female	67	29	21	YES	YES	3	9	142916	15.57	14.32	221.94	225	427.8	35.03	38.4	4.04	134.02	No	1.03	25.5	13	13	102.1	23	28.1074
35	female	66	28	10	YES	YES	3	7	82526.4	12.33	11.95	317.54	150	1752.54	0.96	66.9	3.72	131.4	No	0.96	27.9	28	34	223.4	14	20.7324
36	male	77	39	11	No	No	5	5	40254.4	14.01	11.88	28.71	139	3.95	8.97	390.6	27.03	157.03	Yes	1.2	28.9	5	14	155.1	19	10.9225
37	female	71	32	7	YES	No	3	3	57981.1	16.16	13.85	8.35	162	156.02	53.07	77.3	7.84	117.97	No	1.1	32.2	51	98	162.3	22	16.2042
38	male	77	22	8	YES	YES	4	4	61673.8	13.54	11.95	132	120	210.7	29.94	660.4	33.07	133.55	No	1.08	31.3	20	34	196.9	19	12.6849
39	male	75	31	17	YES	No	11	15	89439.1	17.88	11.31	16.97	150	12231	76.46	497.7	48.45	162.34	Yes	1.48	24.6	10	54	217.4	19	29.0669
40	male	64	24	13	YES	YES	8	8	151730	15.15	12.01	203.05	60	13970.9	69.64	628.4	37.61	139.8	No	0.87	27.4	13	22	274	17	21.3521
41	female	74	25	11	YES	No	12	13	132916	15.57	11.32	221.94	225	327.8	35.03	38.4	4.04	135.02	No	1.03	23.5	13	13	142.1	28	28.1074
42	female	56	23	10	YES	No	3	5	62526.4	3.33	1.95	317.54	150	9592.54	45.96	66.9	3.72	131.4	No	0.96	30.7	28	34	203.4	14	20.7324
43	male	67	31	9	No	No	5	5	40254.4	12.01	9.88	128.71	139	3433.95	0.97	390.6	27.03	157.03	Yes	1.2	26.9	5	14	165.1	14	10.9225
44	female	61	32	17	YES	No	8	11	67981.1	14.16	9.85	8.35	162	1156.02	53.07	77.3	7.84	117.97	No	1.1	22.2	51	98	212.4	18	28.5282
45	male	79	27	14	YES	YES	3	6	56689.7	2.63	2.17	85.53	147	10103.2	16.81	393.9	28.33	159.6	Yes	1.13	29.5	49	80	192.4	21	10.3944
46	male	76	31	11	No	No	4	8	92981.4	4.6	3.61	26.88	118	126.64	23.16	106.3	9.2	137.2	No	1.12	27.6	10	19	173.7	21	9.3532
47	male	69	21	11	No	No	8	9	129898	9.41	7.89	63.26	182	174.63	22.71	145.4	14.94	129	No	1.15	28.2	7	11	101.8	23	15.6865
48	male	76	26	17	YES	No	11	15	69724.6	12.67	11.21	37	178	9837.88	44.58	231.5	42.72	123.8	No	1	28.9	290	756	211.5	12	26.3892
49	male	65	24	13	YES	No	4	9	124005	17.08	14.98	109.38	95	149.15	45.41	113.83	13.89	134.5	No	1.21	30.19	33	32	203.2	15	27.5712
50	female	79	33	11	YES	No	5	17	170293	14.45	11.42	149.04	301	3808.2	26.87	53.8	6	137.8	No	1.27	23.29	9	53	139.6	22	9.7333
51	female	68	28	7	YES	YES	4	4	63309.1	9.56	7.08	52.8	90	180.26	1.85	192.4	20.27	135.6	No	1.79	20.4	19	26	190.24	21	4.555
52	male	68	27	18	No	No	15	19	59598	19.49	10.69	103	174	10202.9	109	80.4	17.02	157.8	Yes	1.18	25.2	9	26	146.3	23	36.7856
53	female	76	23	7	YES	No	5	5	66253.8	15.36	11.84	88.53	45	4973.67	43.45	80.2	7.49	119	No	1.18	28.6	10	16	113.6	25	19.6577
54	female	68	38	11	No	No	3	5	73407.4	17.17	15.97	44.4	37	5457.72	17.97	102.9	7.86	155.2	Yes	1.16	34.9	35	63	259.6	11	9.373
